# Supplementary material for: Longitudinal association between CRP levels and risk of psychosis: a meta-analysis of population-based cohort studies
Source: PubMed Central journal article supplement (PMC8163886; doi:10.1038/s41537-021-00161-4), 2021-05-28
Supplement: 41537_2021_161_MOESM1_ESM.pdf [file 41537_2021_161_MOESM1_ESM.pdf]

# Longitudinal association between C-reactive protein levels and risk of psychosis: a systematic review and meta-analysis of population-based, prospective cohort studies

Emanuele F. Osimo et al, 2021

## Table of contents:

|                                                                                                                                                                                                                                                     |   |
|-----------------------------------------------------------------------------------------------------------------------------------------------------------------------------------------------------------------------------------------------------|---|
| Supplementary Tables .....                                                                                                                                                                                                                          | 2 |
| Supplementary Table 1: Quality assessment of included studies according to the Newcastle-Ottawa quality assessment scale for cohort studies .....                                                                                                   | 2 |
| Supplementary Figures .....                                                                                                                                                                                                                         | 3 |
| Supplementary Figure 1: PRISMA diagram of literature search .....                                                                                                                                                                                   | 3 |
| Supplementary Figure 2: Odds ratios for psychosis at follow-up for individuals with high (>3 mg/L) and medium (1-3 mg/L), as compared to low ( $\leq$ 1 mg/L), CRP levels at baseline .....                                                         | 4 |
| Supplementary Figure 3: Odds ratios for psychosis at follow-up for individuals with high (>3 mg/L), as compared to low ( $\leq$ 3 mg/L), CRP levels at baseline – after excluding individuals with baseline CRP >10mg/L .....                       | 5 |
| Supplementary Figure 4: Odds ratios for psychosis at follow-up per SD increase in CRP levels at baseline – after excluding individuals with baseline CRP >10mg/L .....                                                                              | 6 |
| Supplementary Figure 5: Odds ratios for psychosis at follow-up for individuals with high (>3 mg/L) and medium (1-3 mg/L), as compared to low ( $\leq$ 1 mg/L), CRP levels at baseline – after excluding individuals with baseline CRP >10mg/L ..... | 7 |
| References: .....                                                                                                                                                                                                                                   | 8 |

## Supplementary Tables

### Supplementary Table 1: Quality assessment of included studies according to the Newcastle-Ottawa quality assessment scale for cohort studies

The Newcastle-Ottawa Scale (NOS) considers study quality based on three domains: 1) Quality of subject **'selection'** (representativeness of the exposed cohort, selection of the non-exposed cohort, ascertainment of exposure, demonstration that outcome of interest was not present at start of study, **maximum 4 points**); 2) Quality of **'comparability'** (study controls for most important factor and any additional factor, **maximum 2 points**); 3) Quality of **'outcome'** (including assessment of outcome, length of follow-up, adequacy of follow-up, **maximum 3 points**). A maximum of 9 points was therefore considered.

Thresholds for converting NOS rating to Agency for Healthcare Research and Quality standards (good, fair, poor) (Pillinger et al., 2019). *Good – 3 or 4 stars in Selection AND 1 or 2 in Comparability AND 2 or 3 in Outcome. Fair – 2 stars in Selection AND 1 or 2 in Comparability AND 2 or 3 in Outcome. Poor – 0 or 1 stars in Selection OR 0 in Comparability OR 0 or 1 in Outcome.*

|                                  | Selection           |           |          |                      | Comparability      | Outcome    |                          |                   | HRQ score |
|----------------------------------|---------------------|-----------|----------|----------------------|--------------------|------------|--------------------------|-------------------|-----------|
|                                  | Representative-ness | Selection | Exposure | Outcome not at start | Comparable cohorts | Assessment | Follow-up length of time | Loss to follow-up |           |
| <b>Wium-Andersen et al, 2014</b> | 1                   | 1         | 1        | 1                    | 2                  | 1          | 1                        | 1                 | good      |
| <b>Metcalf et al, 2017</b>       | 1                   | 1         | 1        | 0                    | 2                  | 1          | 1                        | 1                 | good      |
| <b>Laukkanen et al, 2018</b>     | 1                   | 1         | 1        | 1                    | 2                  | 1          | 1                        | 1                 | good      |
| <b>Perry et al, 2021</b>         | 1                   | 1         | 1        | 0                    | 2                  | 1          | 1                        | 0                 | good      |

Supplementary Figures

Supplementary Figure 1: PRISMA diagram of literature search

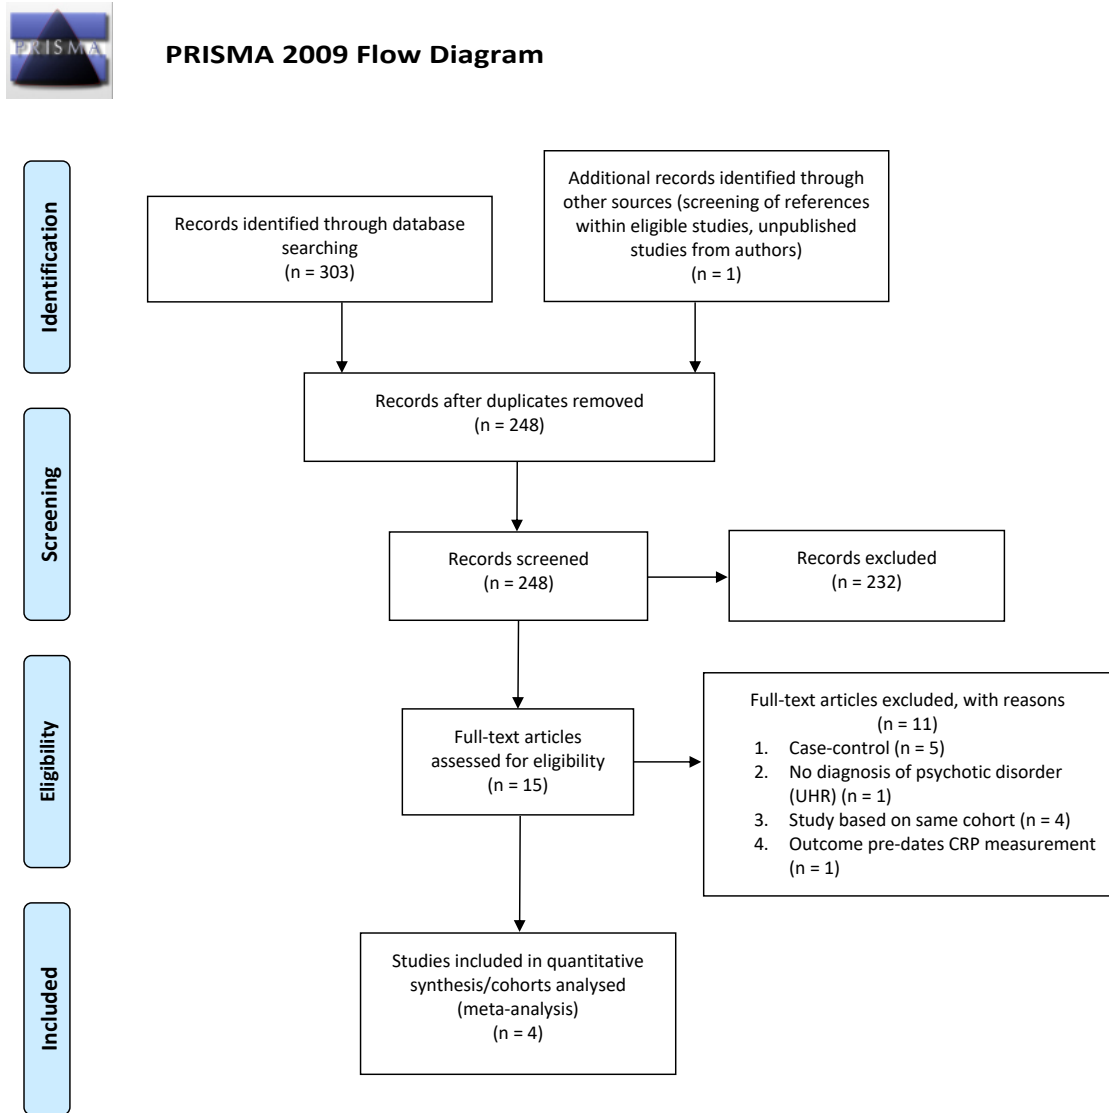

From: Moher D, Liberati A, Tetzlaff J, Altman DG, The PRISMA Group (2009). Preferred Reporting Items for Systematic Reviews and Meta-Analyses: The PRISMA Statement. PLoS Med 6(7): e1000097. doi:10.1371/journal.pmed1000097

For more information, visit [www.prisma-statement.org](http://www.prisma-statement.org).

CRP, C-reactive protein; UHR, ultra-high risk

Supplementary Figure 2: Odds ratios for psychosis at follow-up for individuals with high (>3 mg/L) and medium (1-3 mg/L), as compared to low (<1 mg/L), CRP levels at baseline

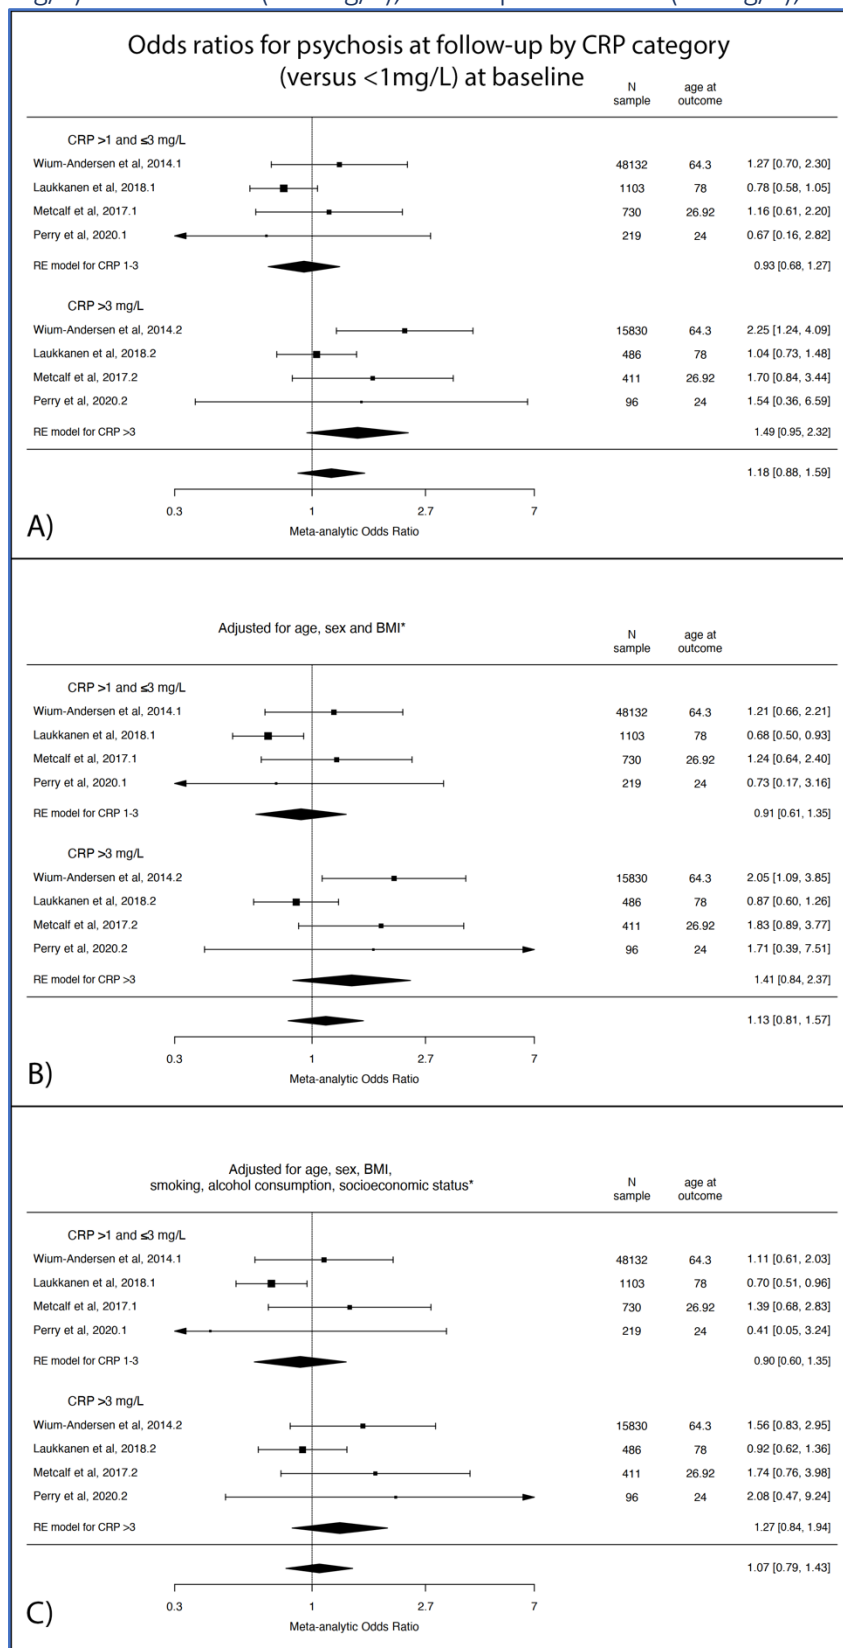

BMI, body mass index; CRP, C-reactive protein; mg/L, milligrams per litre

Supplementary Figure 3: Odds ratios for psychosis at follow-up for individuals with high (>3 mg/L), as compared to low (≤3 mg/L), CRP levels at baseline – after excluding individuals with baseline CRP >10mg/L

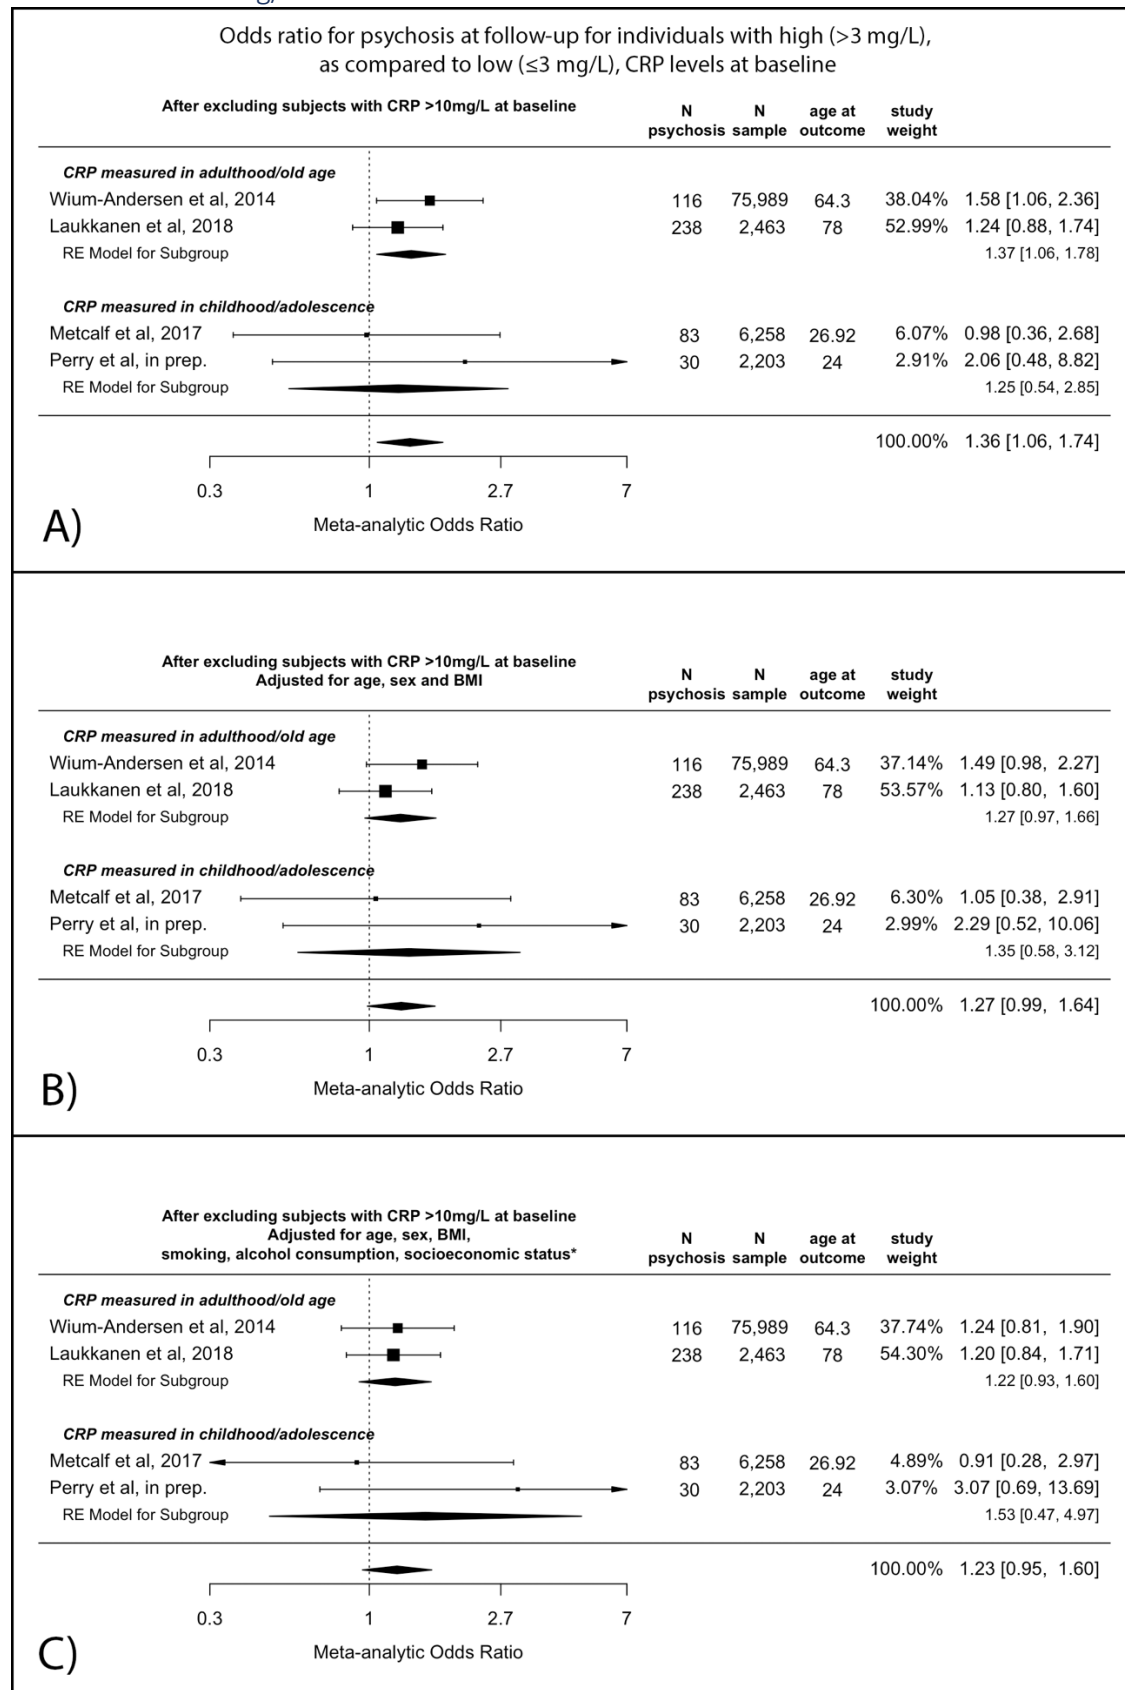

BMI, body mass index; CRP, C-reactive protein; mg/L, milligrams per litre

Supplementary Figure 4: Odds ratios for psychosis at follow-up per SD increase in CRP levels at baseline – after excluding individuals with baseline CRP >10mg/L

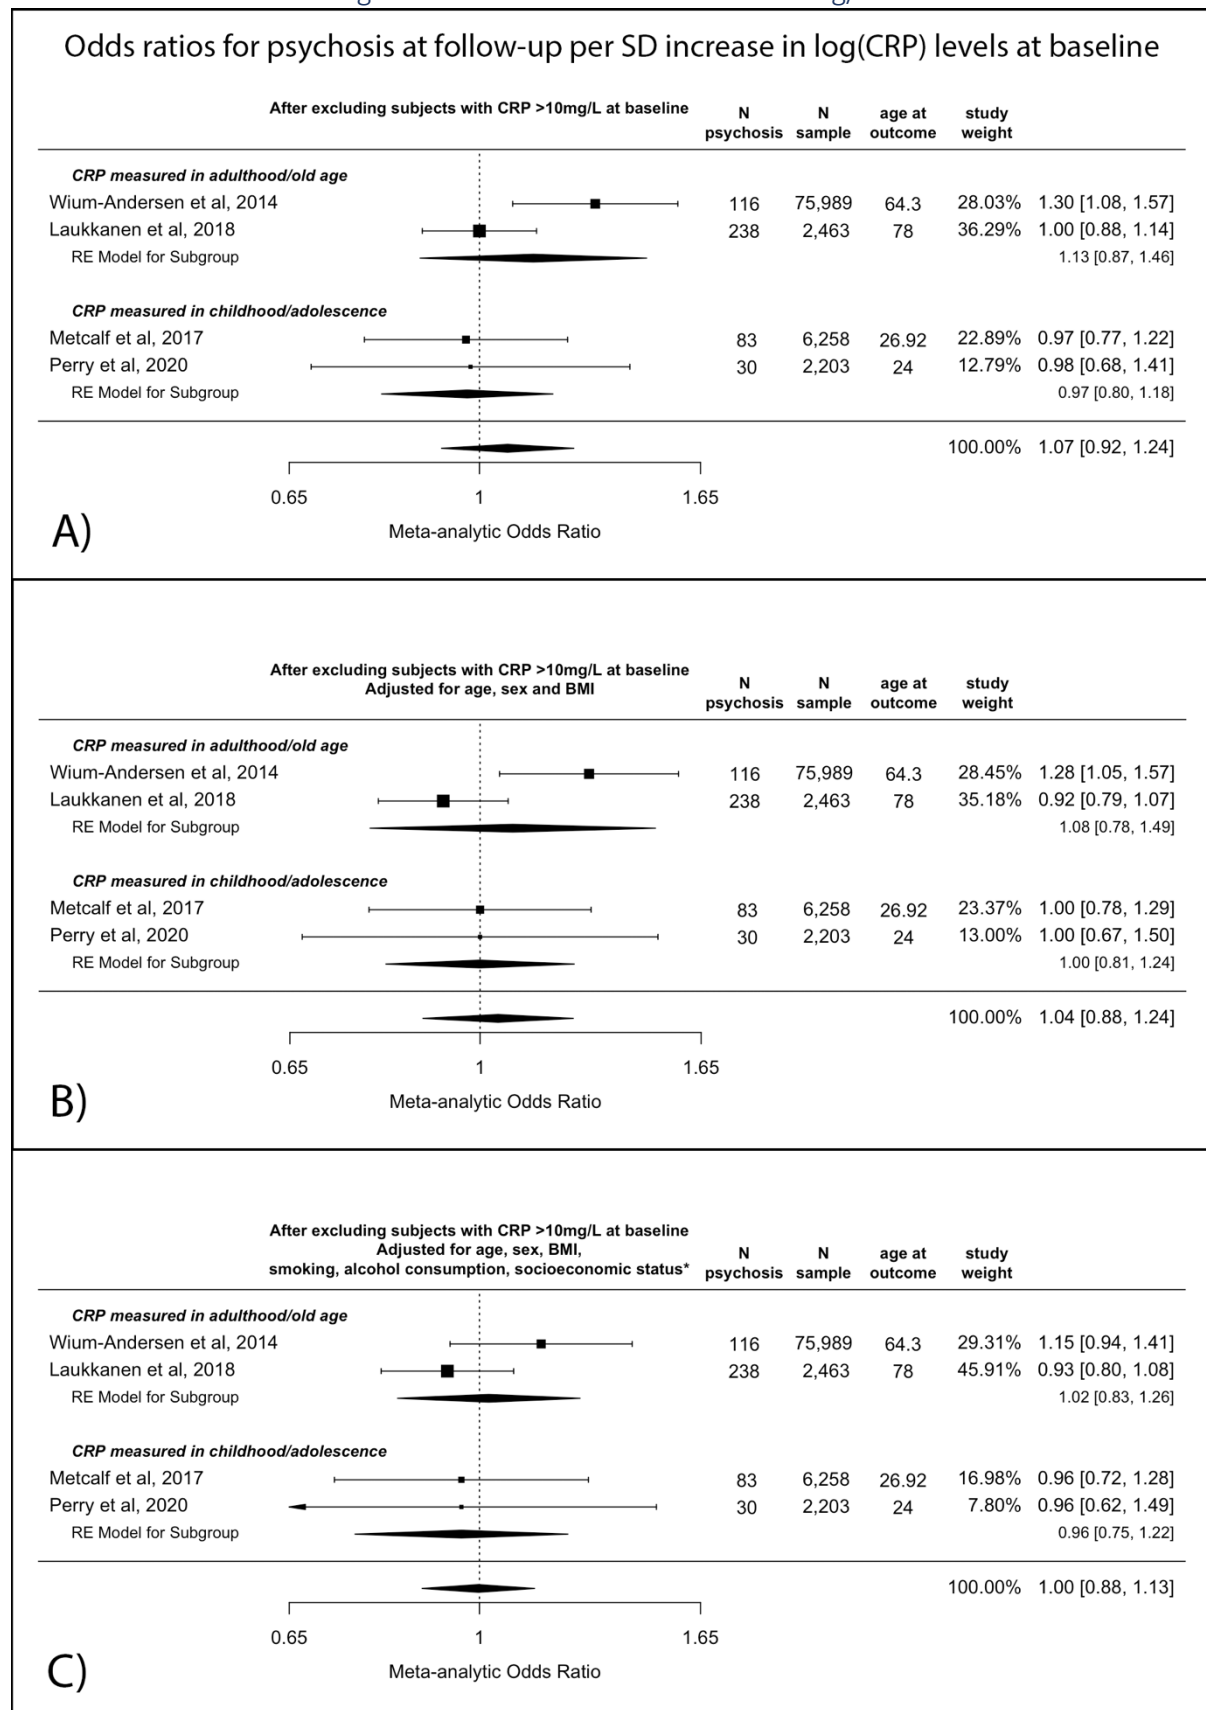

BMI, body mass index; CRP, C-reactive protein; mg/L, milligrams per litre

Supplementary Figure 5: Odds ratios for psychosis at follow-up for individuals with high (>3 mg/L) and medium (1-3 mg/L), as compared to low (<1 mg/L), CRP levels at baseline – after excluding individuals with baseline CRP >10mg/L

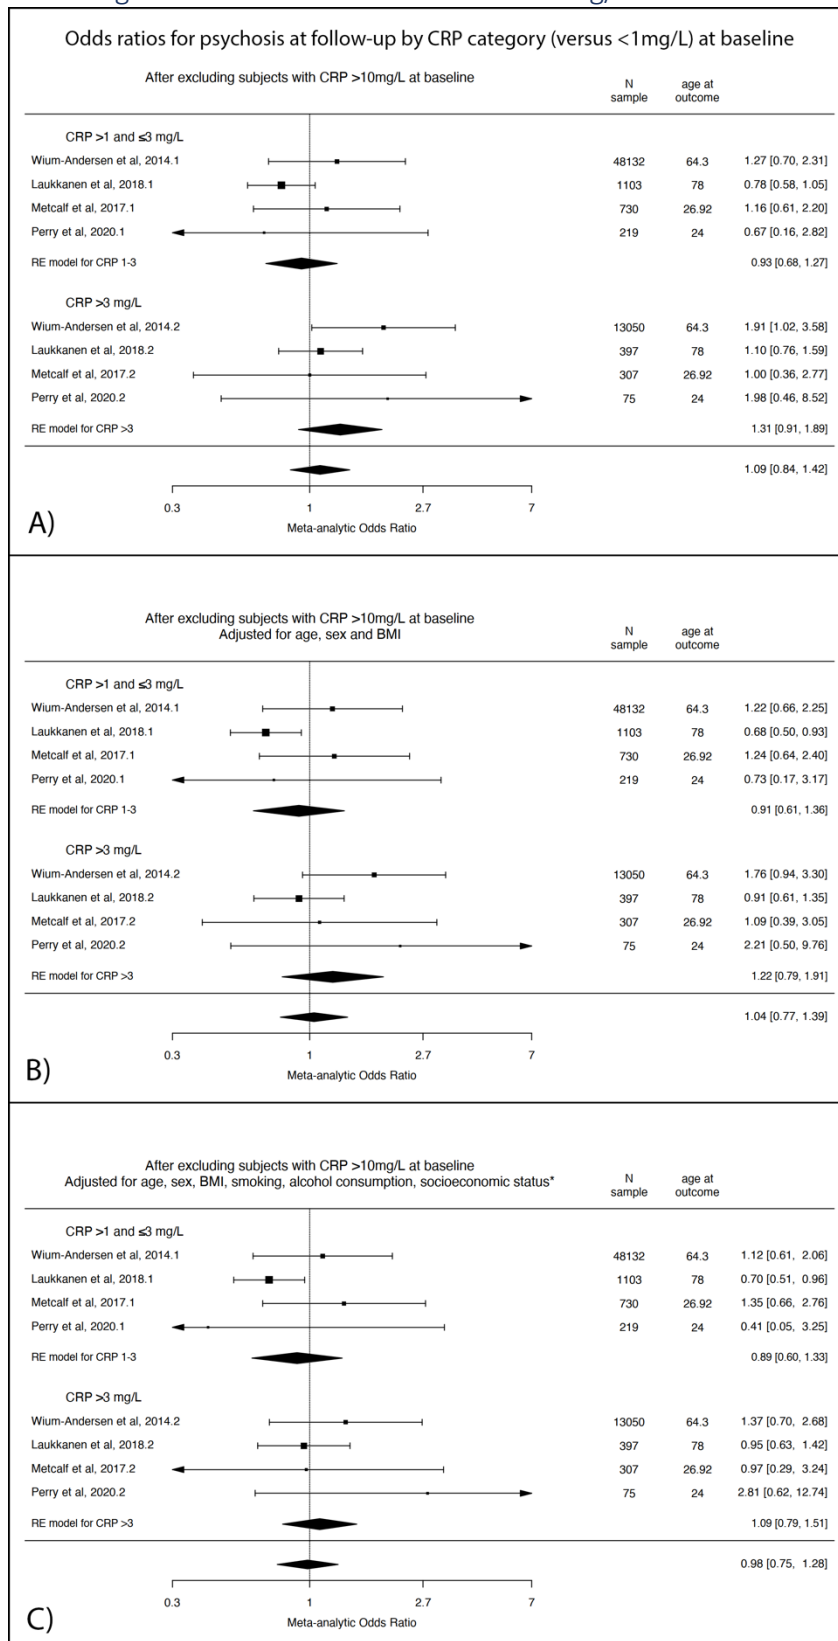

BMI, body mass index; CRP, C-reactive protein; mg/L, milligrams per litre

References:

Pillinger, T., Osimo, E.F., Brugger, S., Mondelli, V., McCutcheon, R.A., Howes, O.D., 2019. A Meta-analysis of Immune Parameters, Variability, and Assessment of Modal Distribution in Psychosis and Test of the Immune Subgroup Hypothesis. *Schizophrenia Bulletin* 45, 1120–1133.
